# Supplementary material for: A Norbornadiene-Based Molecular System for the Storage of Solar–Thermal Energy in an Aqueous Solution: Study of the Heat-Release Process Triggered by a Co(II)-Complex
Source: MDPI journal article supplement (doi:10.3390/molecules28217270), 2023-10-25
Supplement: s1 [file s1]

## SUPPLEMENTARY MATERIALS

**A norbornadiene-based molecular system for the storage of solar-thermal energy in aqueous solution: study of the heat-release process triggered by a Co(II)-complex**

|                                                                                                                                                                                                                                                                                                                                                                                           |     |
|-------------------------------------------------------------------------------------------------------------------------------------------------------------------------------------------------------------------------------------------------------------------------------------------------------------------------------------------------------------------------------------------|-----|
| <b>Figure S1.</b> Distribution diagrams of the species formed by HNBD1 (a) and HQC1 (b) as a function of pH in water calculated by using the determined pKa values.                                                                                                                                                                                                                       | S2  |
| <b>Figure S2.</b> a) Evolution with time of the $^1\text{H}$ NMR spectrum ( $\text{D}_2\text{O}$ , pH 11, 298 K, 400 MHz) of $\text{QC1}^-$ at 370 K. b) Logarithmic decay of the integral of the $^1\text{H}$ NMR signal of $\text{QC1}^-$ at 2.5 ppm and corresponding fitting. Inset: Fitting details and parameters.                                                                  | S3  |
| <b>Figure S3:</b> UV-Vis spectra measured after each irradiation time of a 1.524 mM $\text{D}_2\text{O}$ solution of $\text{NBD1}^-$ at pH = 10.96.                                                                                                                                                                                                                                       | S4  |
| <b>Figure S4.</b> $^1\text{H}$ NMR spectra measured after each irradiation period of a $\text{D}_2\text{O}$ solution of $\text{NBD1}^-$ at pH = 10.67.                                                                                                                                                                                                                                    | S5  |
| <b>Figure S5.</b> a) Photon flux determination of the 275 nm LED used in this work. b) UV-Vis absorption spectra recorded during the photoisomerization experiments performed for the determination of quantum yield. c) Linear fit of the concentration of $\text{NBD1}^-$ calculated using absorbance values at 300 nm. Initial concentration of $\text{NBD1}^-$ 1.524 mM, pH of 10.96. | S6  |
| <b>Figure S6</b> DSC thermograms for HNBD1. Scan rate $2\text{ }^\circ\text{C}\cdot\text{min}^{-1}$ .                                                                                                                                                                                                                                                                                     | S7  |
| <b>Figure S7.</b> Example of ITC profile of the $\text{QC1}^-$ to $\text{NBD1}^-$ interconversion obtained upon addition of Co-TPPC (5% molar percentage relative to $\text{QC1}^-$ ) to an aqueous solution of $\text{QC1}^-$ ( $1.2\text{ cm}^3$ , 3.32 mM).                                                                                                                            | S8  |
| <b>Figure S8.</b> $^1\text{H}$ NMR spectrum (400 MHz, $\text{CDCl}_3$ ) of (3).                                                                                                                                                                                                                                                                                                           | S9  |
| <b>Figure S9.</b> $^{13}\text{C}$ NMR spectrum (100 MHz, $\text{CDCl}_3$ ) of (3).                                                                                                                                                                                                                                                                                                        | S10 |
| <b>Figure S10.</b> $^1\text{H}$ NMR spectrum (400 MHz, $\text{CDCl}_3$ ) of HNBD1.                                                                                                                                                                                                                                                                                                        | S11 |
| <b>Figure S11.</b> $^{13}\text{C}$ NMR spectrum (100 MHz, $\text{CDCl}_3$ ) of HNBD1.                                                                                                                                                                                                                                                                                                     | S12 |
| <b>Figure S12.</b> $^1\text{H}$ NMR spectrum (400 MHz, $\text{CDCl}_3$ ) of HQC1.                                                                                                                                                                                                                                                                                                         | S13 |
| <b>Figure S13.</b> $^{13}\text{C}$ NMR spectrum (100 MHz, $\text{CDCl}_3$ ) of HQC1.                                                                                                                                                                                                                                                                                                      | S14 |

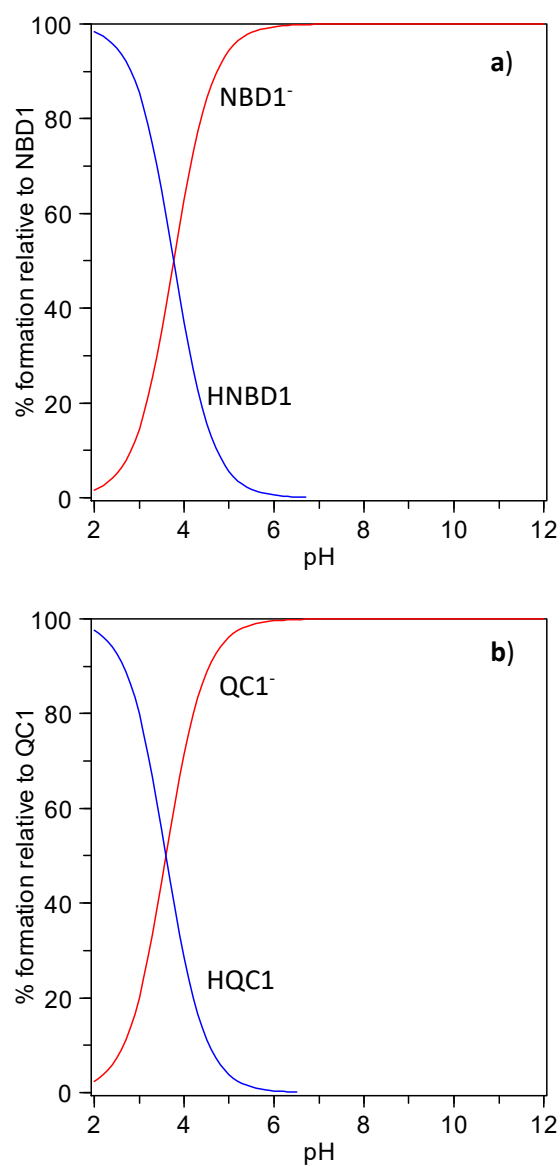

**Figure S1.** Distribution diagrams of the species formed by NBD1 (a) and QC1 (b) as a function of pH calculated by using the determined  $pK_a$  values.

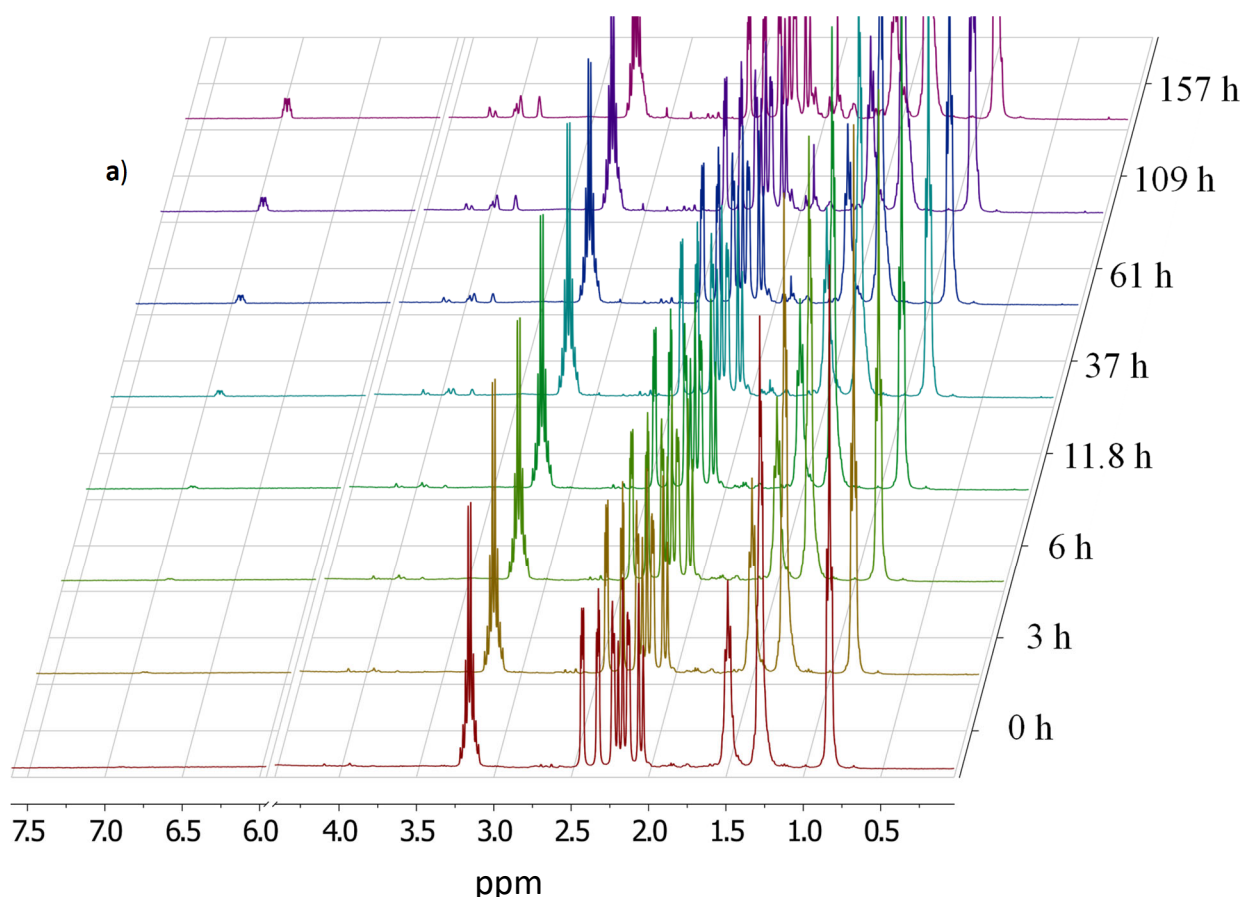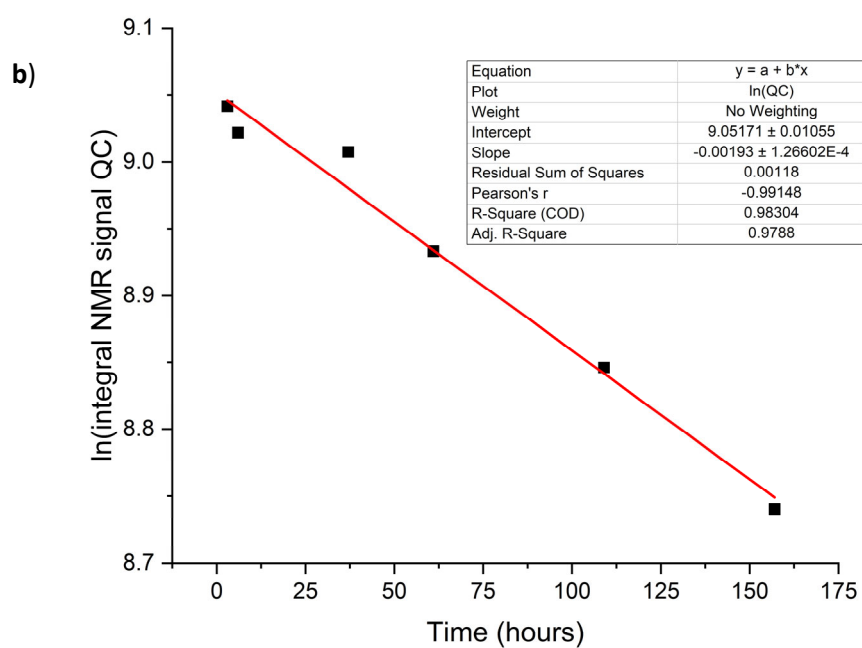

**Figure S2.** a) Evolution with time of the  $^1\text{H}$ -NMR spectrum ( $\text{D}_2\text{O}$ , pH 11, 298 K, 400 MHz) of  $\text{QC1}^-$  at 370 K. b) Logarithmic decay of the integral of the  $^1\text{H}$ -NMR signal of  $\text{QD1}^-$  at 2.5 ppm and corresponding fitting. Inset: Fitting details and parameters.

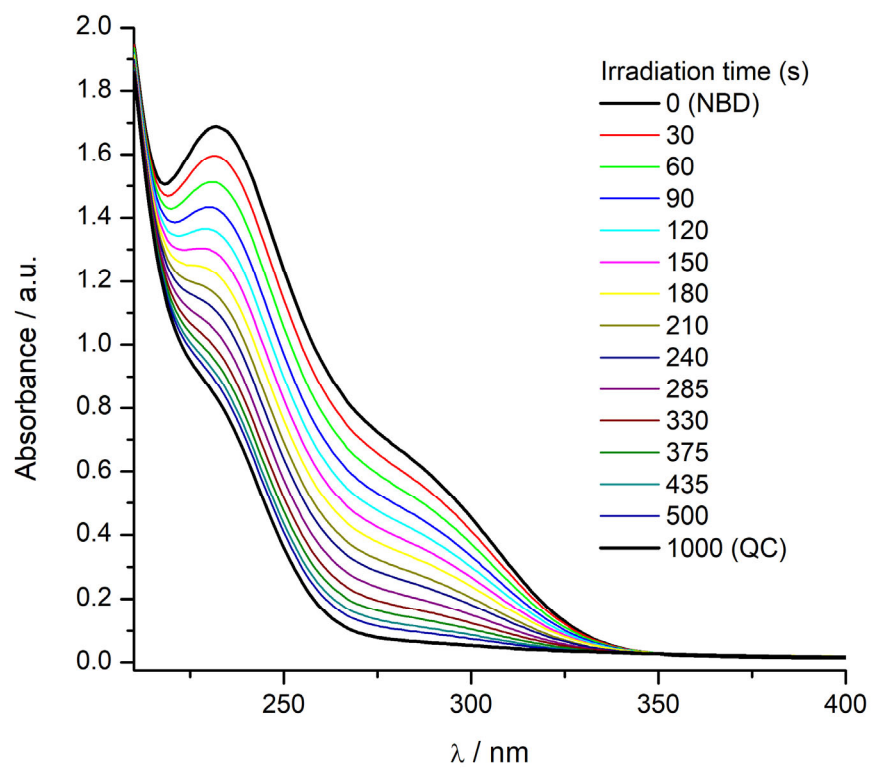

**Figure S3:** UV-Vis spectra measured after each irradiation time of a 1.524 mM  $\text{D}_2\text{O}$  solution of  $\text{NBD1}^-$  at pH = 10.96.

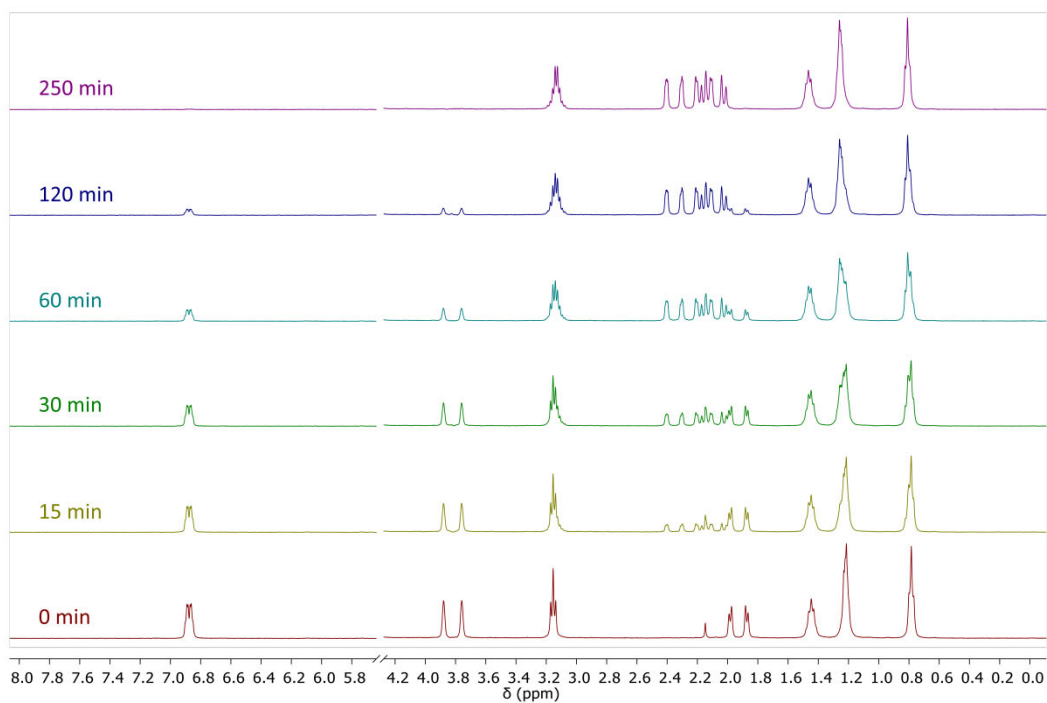

**Figure S4.**  $^1\text{H}$ -NMR spectra measured after each irradiation period of a  $\text{D}_2\text{O}$  solution of  $\text{NBD1}^-$  at  $\text{pH} = 10.67$ .

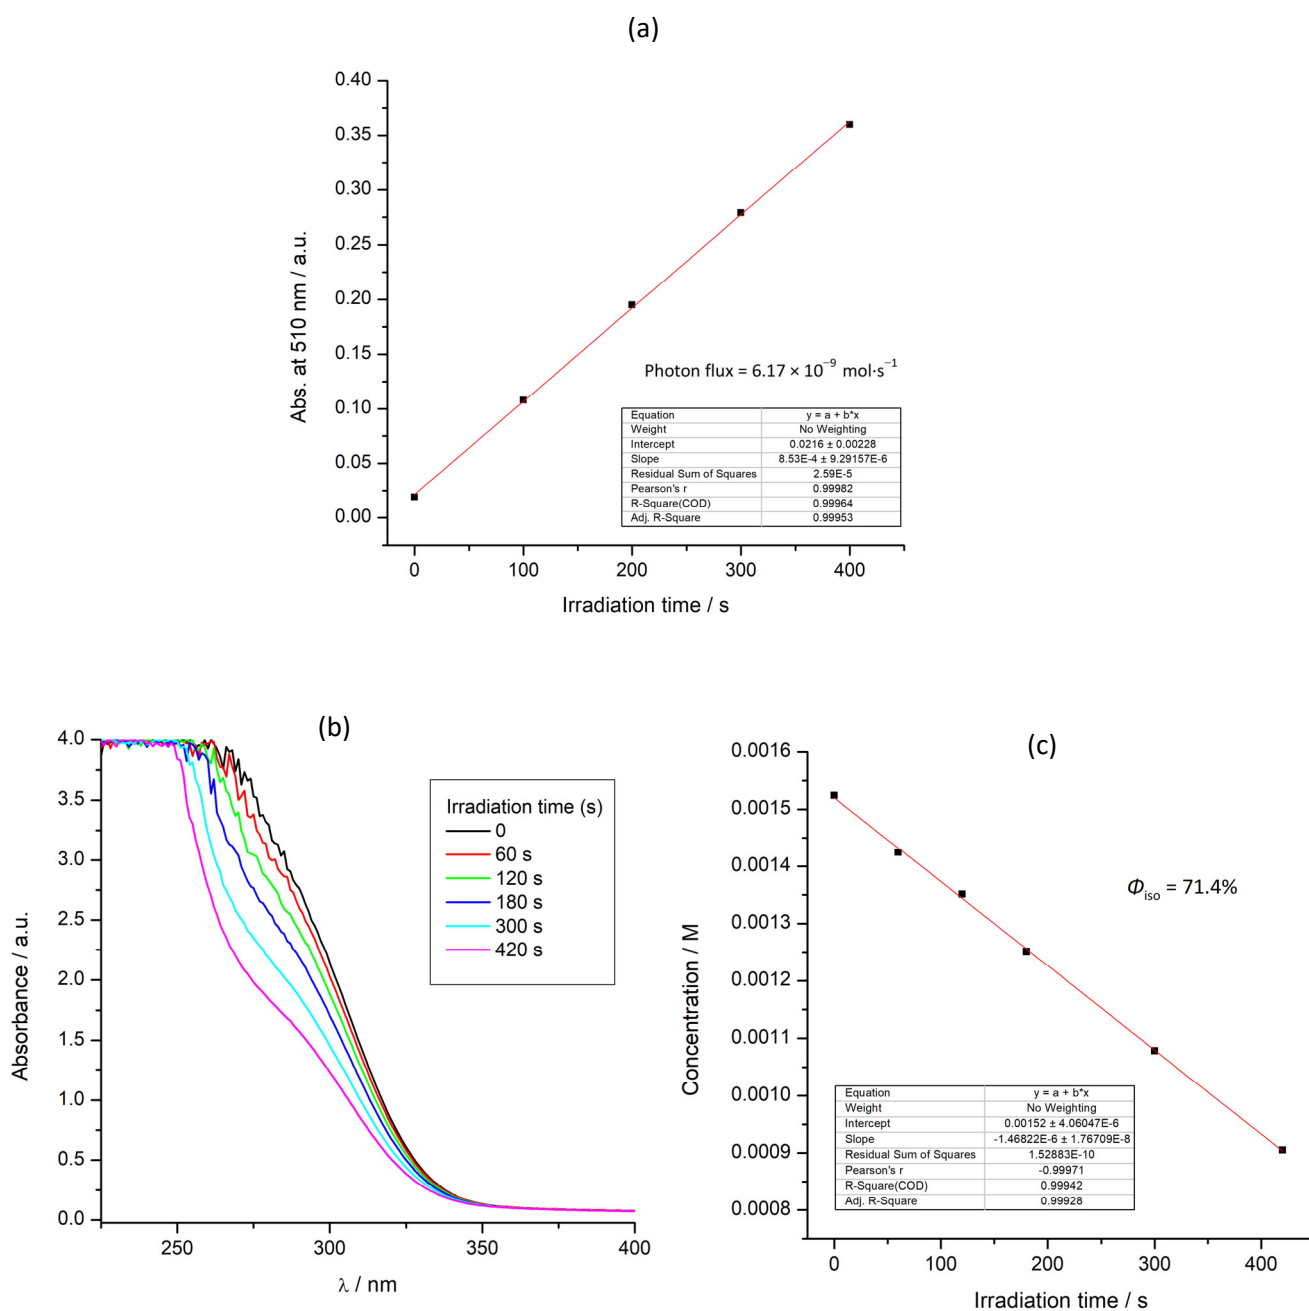

**Figure S5.** a) Photon flux determination of the 275 nm LED used in this work. b) UV-Vis absorption spectra recorded during the photoisomerization experiments performed for the determination of quantum yield. c) Linear fit of the concentration of NBD1<sup>-</sup> calculated using absorbance values at 300 nm. Initial concentration of NBD1<sup>-</sup> 1.524 mM, pH of 10.96.

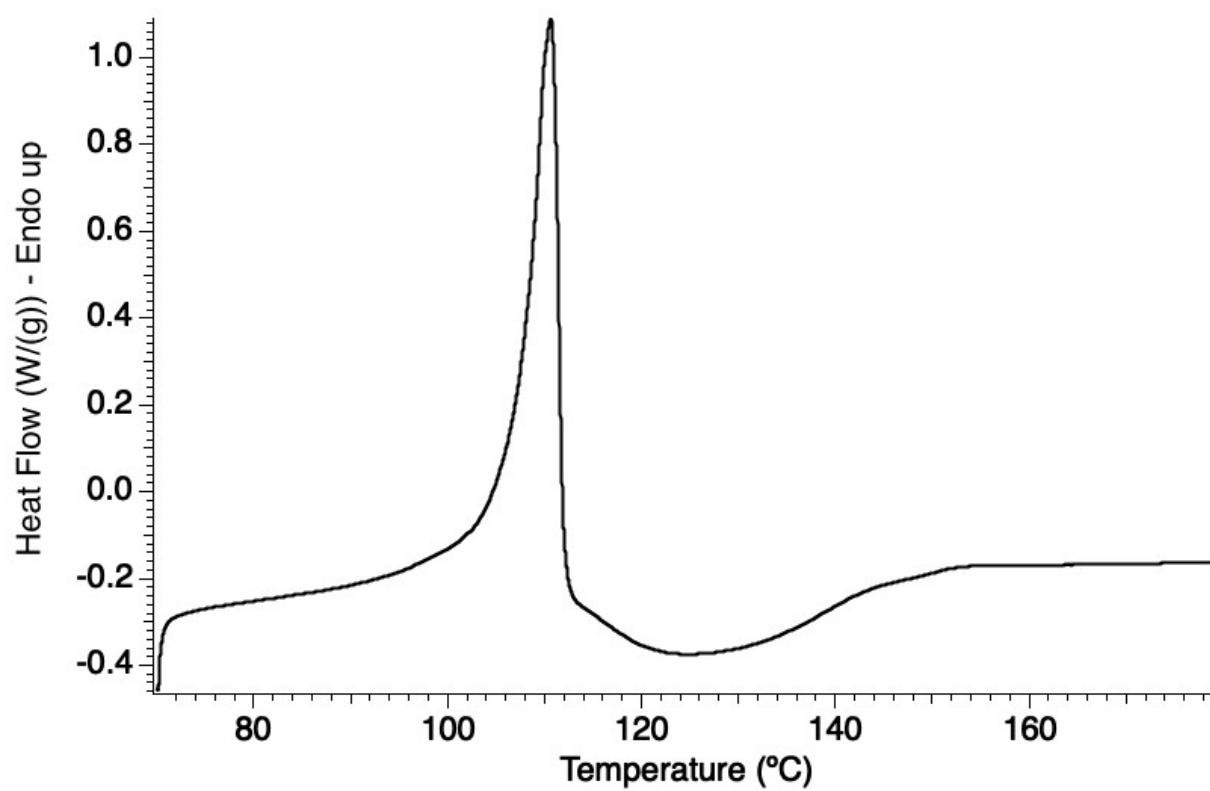

**Figure S6.** DSC thermograms for HNBD1. Scan rate 2 °C·min<sup>-1</sup>.

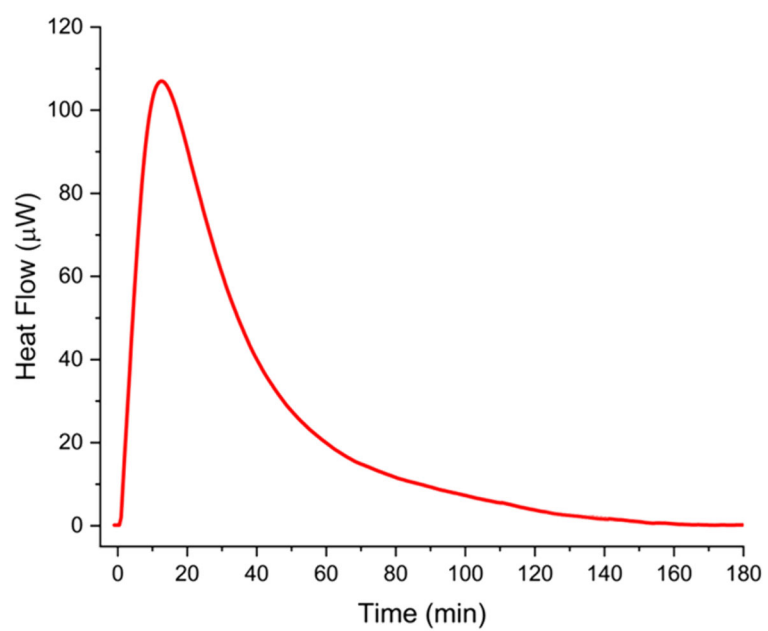

**Figure S7.** Example of ITC profile of the QC1<sup>-</sup> to NBD1<sup>-</sup> interconversion obtained upon addition of Co-TPPC (5% molar percentage relative to QC1<sup>-</sup>) to an aqueous solution of QC1<sup>-</sup> (1.2 cm<sup>3</sup>, 3.32 mM).



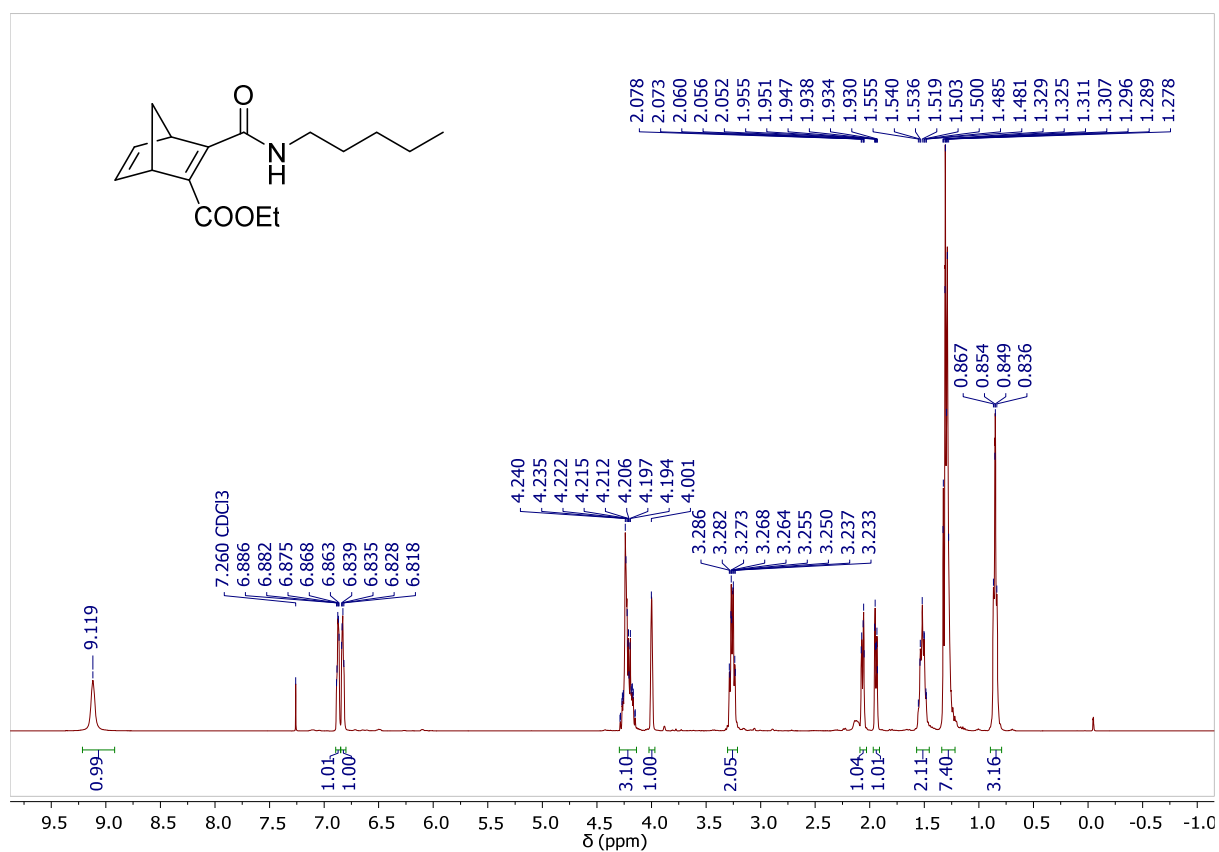

**Figure S8.** <sup>1</sup>H-NMR spectrum (400 MHz, CDCl<sub>3</sub>) of **3**.

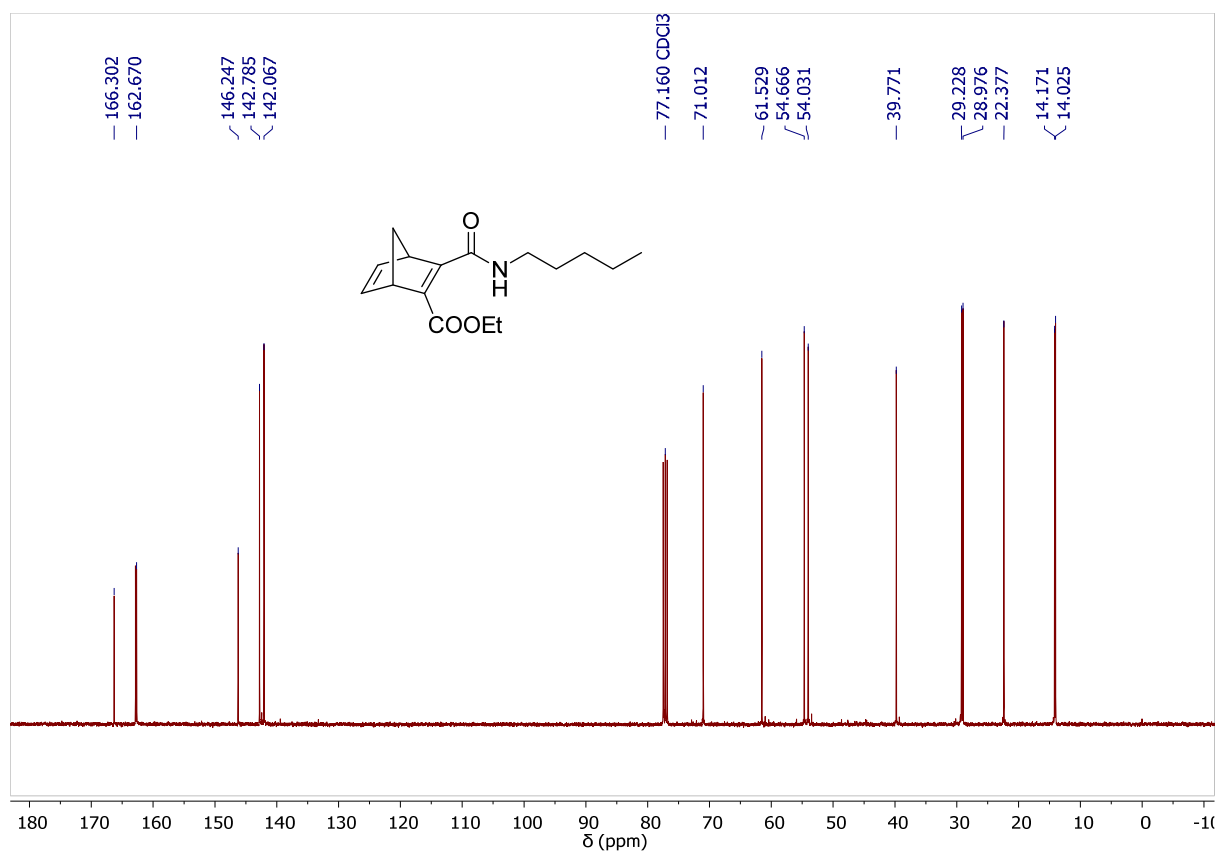

**Figure S9.** <sup>13</sup>C-NMR spectrum (100 MHz, CDCl<sub>3</sub>) of **(3)**.

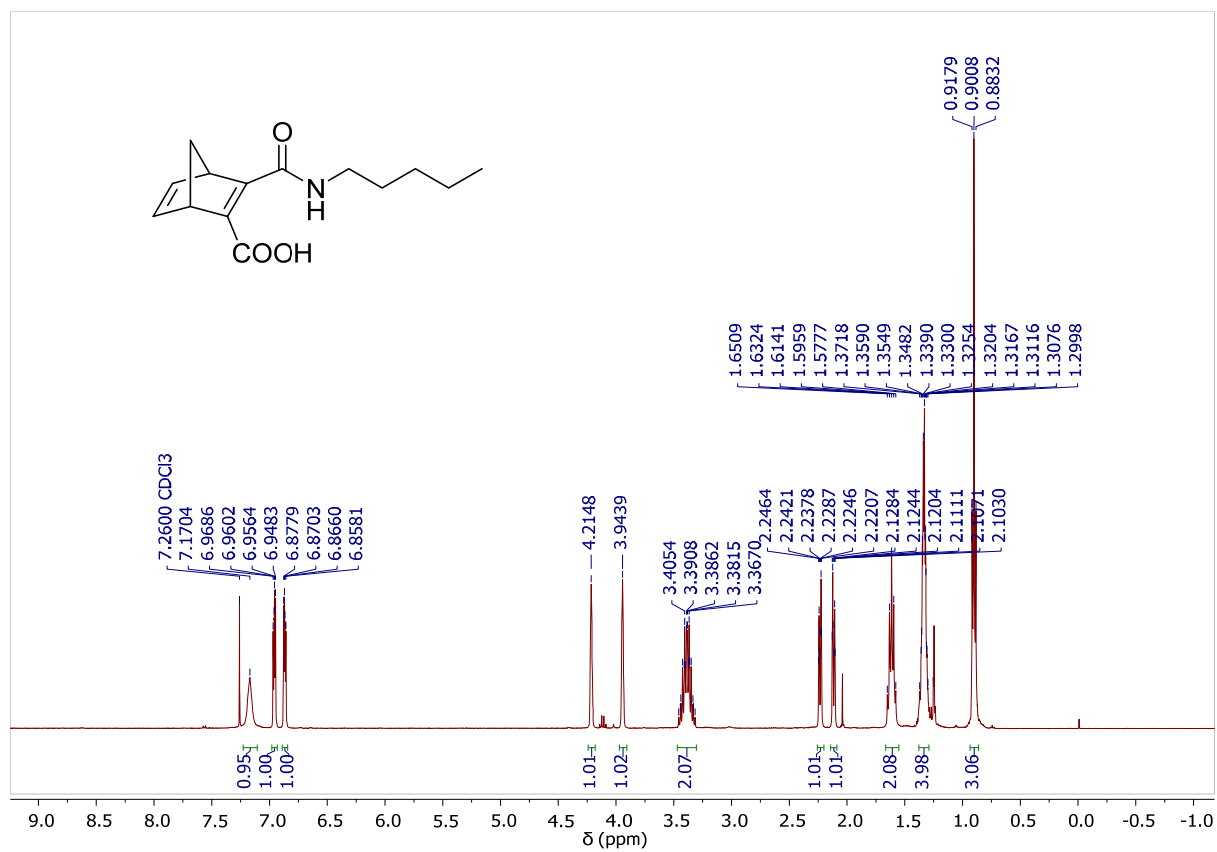

**Figure S10.** <sup>1</sup>H-NMR spectrum (400 MHz, CDCl<sub>3</sub>) of HNBD1.

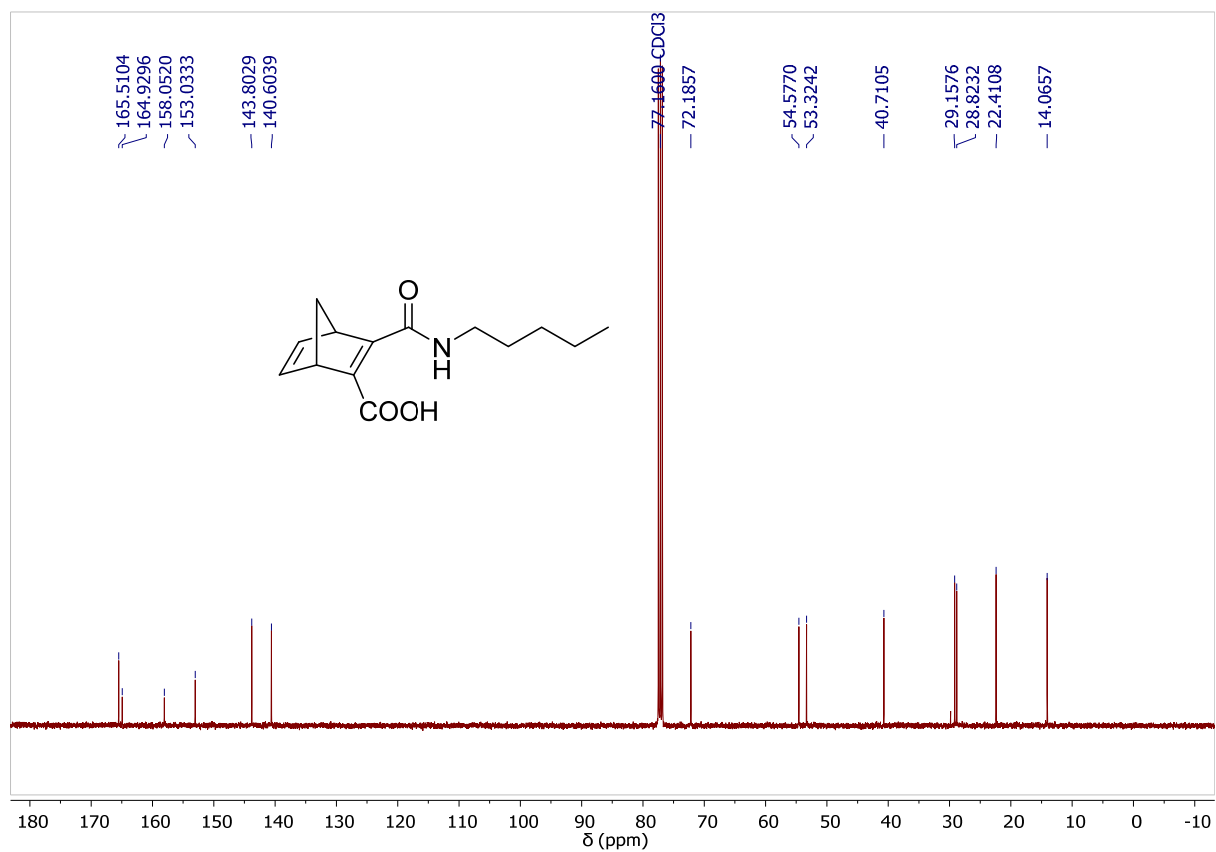

**Figure S11.** <sup>13</sup>C-NMR spectrum (100 MHz, CDCl<sub>3</sub>) of HNBD1.

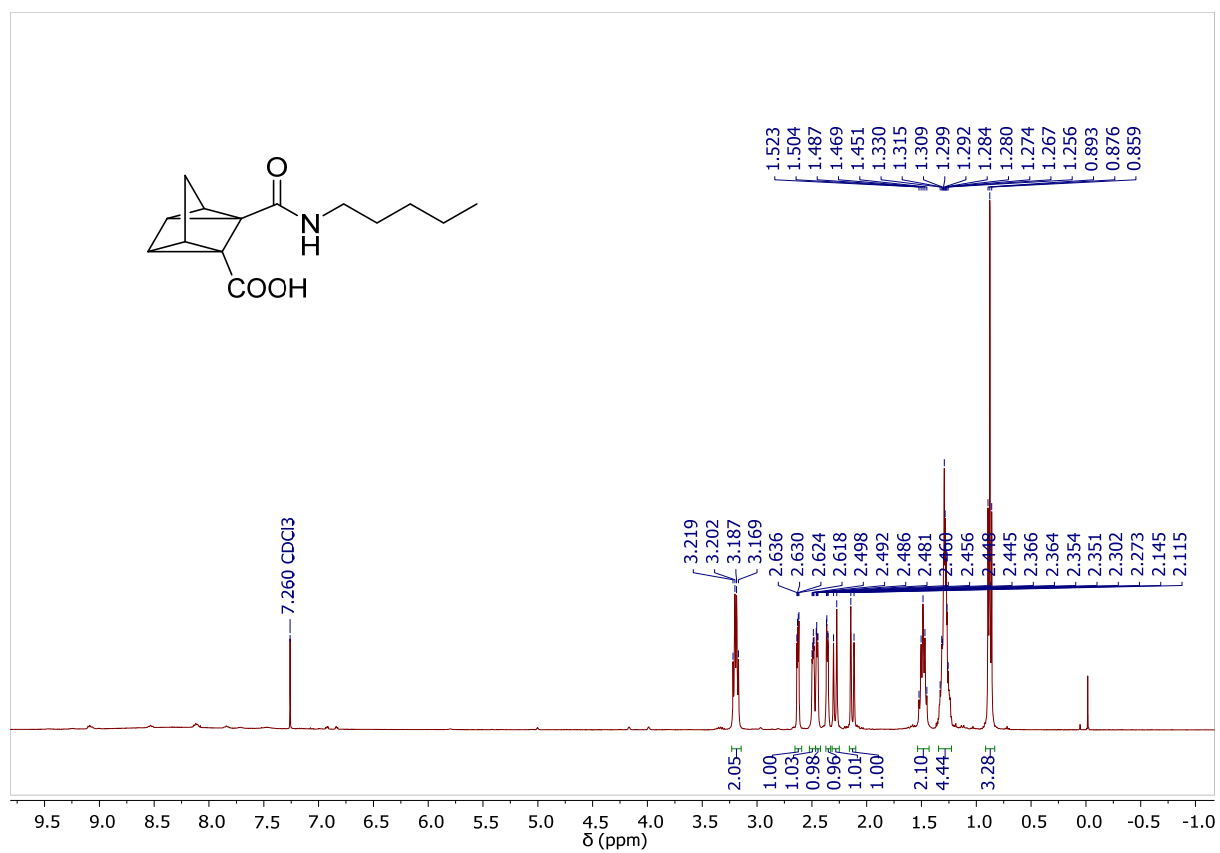

**Figure S12.** <sup>1</sup>H-NMR spectrum (400 MHz, CDCl<sub>3</sub>) of HQC1.

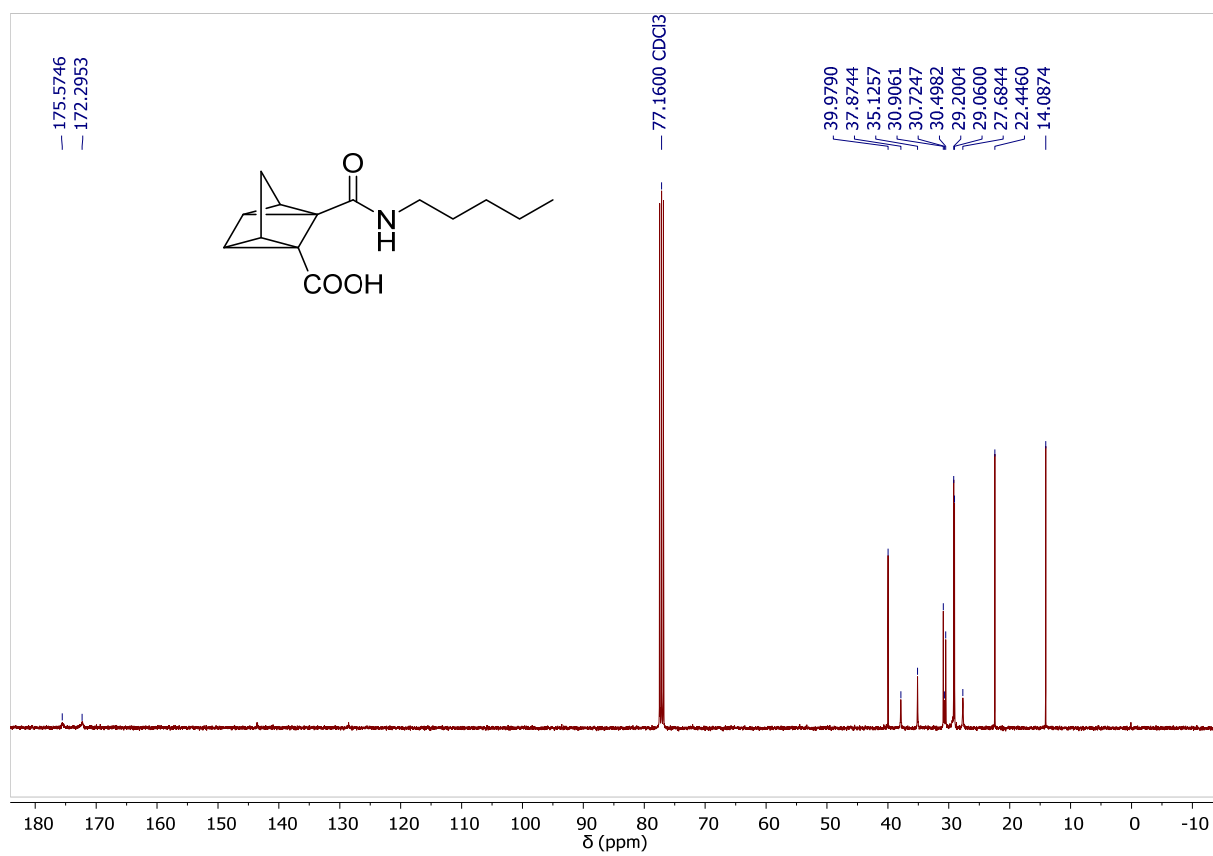

**Figure S13.**  $^{13}\text{C}$ -NMR spectrum (100 MHz,  $\text{CDCl}_3$ ) of HQC1.
